# Supplementary material for: Synthesis and bioevaluation of thienopyrimidines bearing a pyrazoline unit as selective PI3Kα inhibitors
Source: Royal Society of Chemistry journal article supplement (doi:10.1039/c9ra06192d), 2019-01-01

# <sup>1</sup>H NMR Spectral

**13c.** <sup>1</sup>H NMR (400 MHz). Solvent: DMSO

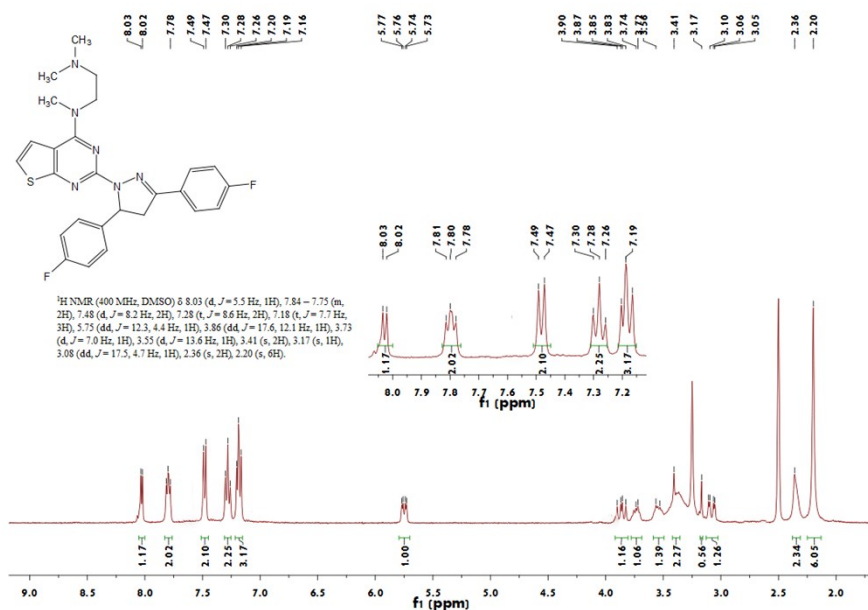

**13f.** <sup>1</sup>H NMR (400 MHz). Solvent: DMSO

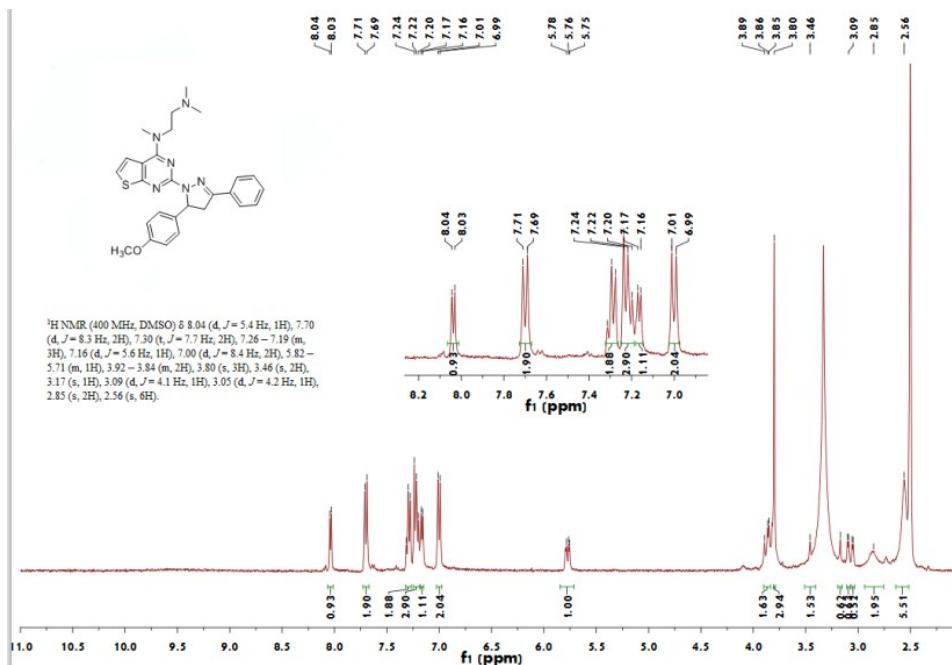

**13g.**  $^1\text{H}$  NMR (400 MHz). Solvent: DMSO

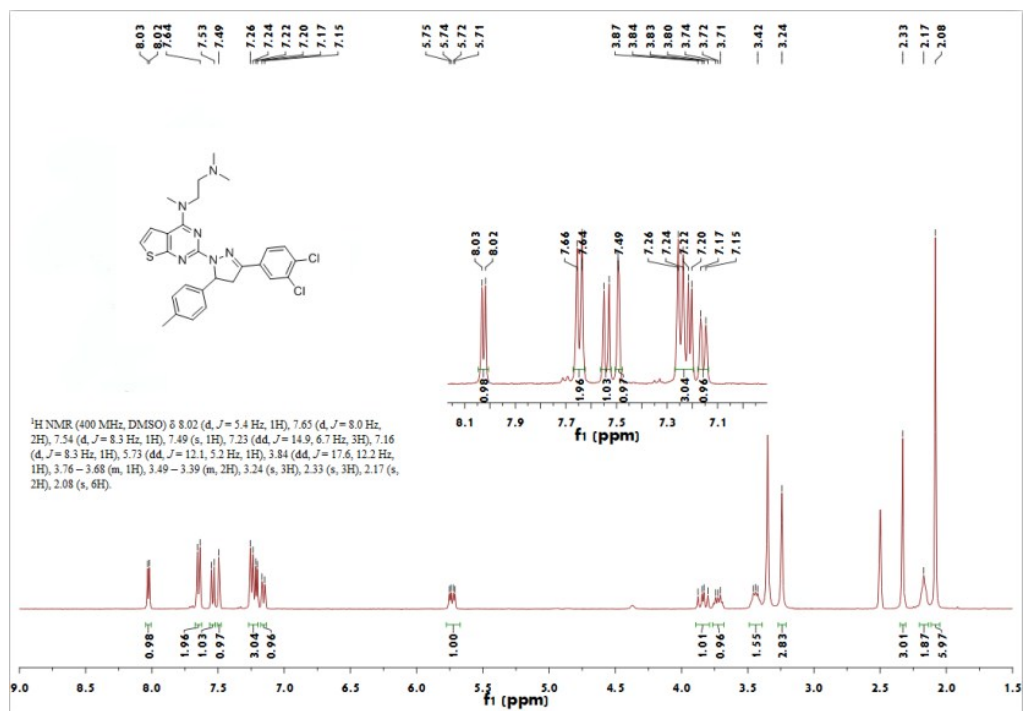

**13h.**  $^1\text{H}$  NMR (400 MHz). Solvent: DMSO

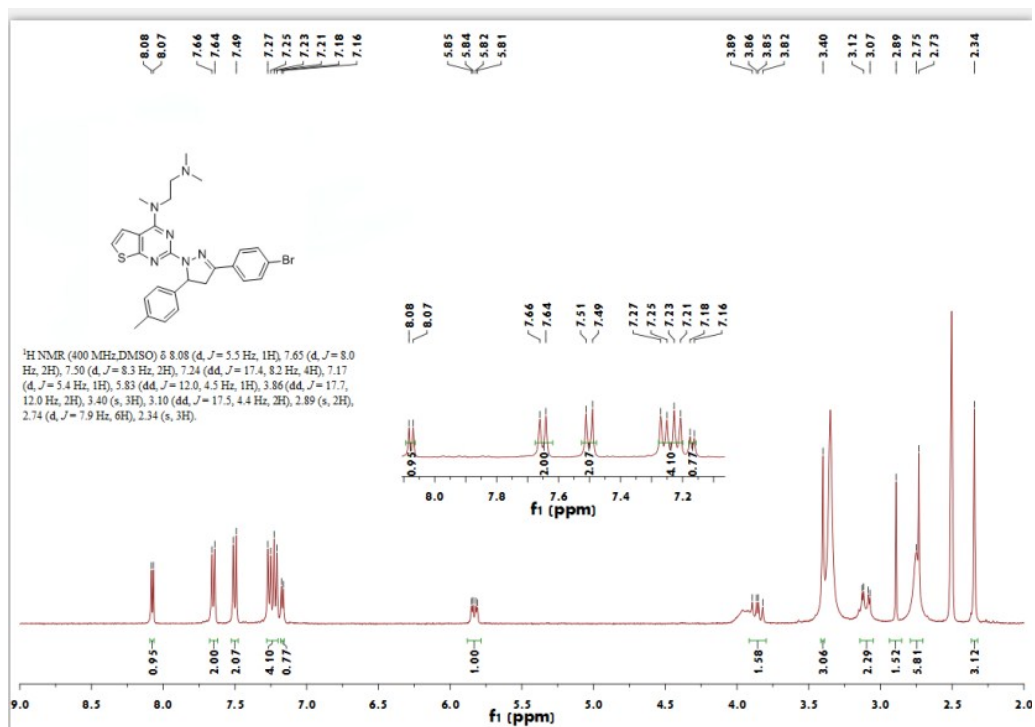

Supplement: c9ra06192d1.pdf [file c9ra06192d1.pdf]
